# Supplementary material for: Drug-Drug Interaction of Ergotamine with a Combination of Darunavir, Abacavir, and Lamivudine Causing a Fatal Vasospastic Ischemia
Source: Hindawi journal article supplement (doi:10.1155/2018/4107450), 2018-12-19
Supplement: f1 [file 4107450.f1.pdf]

# Supplementary information nr 1: Blood results

|                                     | 27/08<br>07:43 | 27/08<br>11:51 | 27/08<br>17:34 | 28/08<br>07:05 | 29/08<br>07:03 | 30/08<br>07:08 | 31/08<br>07:20 | 01/09<br>07:21 | 02/09<br>07:02 | 03/09<br>06:37 | Units   | Normal values |
|-------------------------------------|----------------|----------------|----------------|----------------|----------------|----------------|----------------|----------------|----------------|----------------|---------|---------------|
| <b>Hematology</b>                   |                |                |                |                |                |                |                |                |                |                |         |               |
| Haemoglobine                        | 15.1 +         |                | 12.3           | 11.6           | 9.2 -          | 9.3 -          | 10.1 -         | 9.2 -          | 9.2 -          | 8.2 -          | g/dl    | 10.8-14.2     |
| Hematocrit                          | 0.417 +        |                | 0.355          | 0.336 -        | 0.264 -        | 0.271 -        | 0.287 -        |                | 0.277 -        | 0.243 -        | l/l     | 0.35-0.41     |
| Red blood cell count                | 4.98 +         |                | 4.16           | 3.92           | 3.07-          | 3.22 -         | 3.42 -         |                | 3.13 -         | 2.74 -         | 10*12/l | 3.65-4.59     |
| Reticulocytes                       | 6.20 +         |                |                | 61.50          | 51.00          | 62.50          | 46.80          |                | 36.90          | 59.20          | 10*9/l  | 16.0-66.0     |
| Mean cell volume                    | 83.7           |                | 85.3           | 85.7           | 86.0           | 84.2           | 83.9           |                | 88.5           | 88.7           | fl      | 82.4-97.3     |
| Mean cell haemoglobin               | 30.3           |                | 29.6           | 29.6           | 30.0           | 28.9           | 29.5           |                | 29.4           | 29.9           | pg      | 25.0-34.2     |
| Mean cell haemoglobin concentration | 36.2           |                | 34.6           | 34.5           | 34.8           | 34.3           | 35.2           |                | 33.2           | 33.7           | g/dl    | 33.2-36.9     |
| RDW                                 | 14.0           |                | 14.0           | 14.0           | 14.0           | 14.0           | 15.0 +         |                | 16.0 +         | 16.0 +         | %       | 12.2-14.8     |
| Platelets                           | 109.0 -        |                | 83.0 --        | 82.0 -         | 84.0 -         | 93.0 -         | 132.0 -        | 146.0          | 138.0 -        | 107.0 -        | 10*9/l  | 142.00-330.00 |
| White blood cells                   | 11.5 +         |                | 9.3            | 7.8            | 6.2            | 6.6            | 17.7 +         | 16.4 +         | 17.8 +         | 14.0 +         | 10*9/l  | 3.45-9.76     |
| Prothrombin time                    | 82.0           |                |                | 85.0           | 84.0           | 84.0           | 83.0           | 83.0           | 66.0 -         |                | %       | 70.0-100.0    |
| Prothrombin time                    | 14.20          |                |                | 13.90          | 14.00          | 14.00          | 14.10          | 14.10          | 16.50          |                | sec     | 11.0-15.5     |
| APTT                                | 34.8           |                |                | 41.2 +         | 39.1           | 50.4 +         | 37.4           | 33.1           | 35.4           |                | sec     | 28.0-40.0     |
| Fibrinogen                          | 6.60 ++        |                |                |                |                |                |                |                |                |                | g/l     | 2.00-4.00     |
| D-dimer                             | 2.2 ++         |                |                |                |                |                |                |                |                |                | mg/l    | < 0.5         |
| <b>Biochemistry</b>                 |                |                |                |                |                |                |                |                |                |                |         |               |
| C-reactive Protein                  | 24.1 +         |                | 27.8 +         | 26.9 +         | 29.0 +         | 32.8 +         | 25.0 +         | 12.1 +         | 16.9 +         | 27.2 +         | mg/dl   | < 1.0         |
| Total protein                       | 67             |                |                | 47 -           | 38 -           | 38 -           | 35 -           |                | 45 -           | 39 -           | g/l     | 60-78         |
| Albumin                             |                |                |                | 2.2 -          | 1.7 -          | 2.0            | 1.5 -          |                | 2.4 -          | 2.0 -          | g/l     | 3.5-5.0       |
| Triglycerides                       |                |                |                |                |                | 104            |                |                | 87             |                | mg/dl   | < 150         |
| CK                                  | 2258 +         |                | 4440 +         | 6398 +         | 1514 +         | 1186 +         | 1532 +         |                | 3872 +         | 2965 +         | U/l     | 35-230        |
| CK-MB                               | 77             |                | 113            | 172            | 74             | 41             | 46             |                | 42             | 24             | U/l     |               |
| AST                                 | 107 +          |                |                | 260 +          | 136 +          | 102 +          | 109 +          |                | 194 +          | 165 +          | U/l     | 14-36         |
| ALT                                 | 35             |                |                | 72 +           | 73 +           | 67 +           | 57 +           |                | 86 +           | 87 +           | U/l     | < 41          |

|                             |         |        |        |        |        |        |        |        |        |        |                           |                             |
|-----------------------------|---------|--------|--------|--------|--------|--------|--------|--------|--------|--------|---------------------------|-----------------------------|
| LDH                         | 693 +   |        |        | 966 +  | 1171 + | 1050 + | 999 +  |        | 1428 + | 1296 + | U/l                       | 316-618                     |
| Amylase                     | 39      |        |        | 55     | < 30   | < 30   | 62     |        | 115 +  | 179 +  | U/l                       | 30-110                      |
| Lipase                      | 36      |        |        | 89     | 35     | 35     | 45     |        | 103    | 128    | U/l                       | 23-300                      |
| Alk. phosphatase            | 104     |        |        | 80     | 77     | 82     | 107    |        | 121    | 123    | U/l                       | 38-126                      |
| Gamma-GT                    | 25      |        |        | 18     | 29     | 30     | 60 +   |        | 170 +  | 187 +  | U/l                       | 12-43                       |
| Bilirubin                   |         |        |        | 0.1 -  | 0.2    | 0.9    | 0.3    |        | 0.5    | 0.7    | mg/dl                     | 0.2-1.3                     |
| Glucose                     | 114 +   |        | 89     | 144 +  | 135 +  | 98     | 124 +  | 132 +  | 135 +  | 123 +  | mg/dL                     | 76-110                      |
| Sodium                      | 121 --  | 123 -- | 125 -- | 124 -  | 123 -  | 137    | 139    | 138    | 144    | 148 +  | meq/l                     | 137-145                     |
| Potassium                   | 4.0     | 3.7    | 4.0    | 3.9    | 3.6    | 4.2    | 4.4    | 4.4    | 4.1    | 4.1    | meq/l                     | 3.5-5.1                     |
| Chloride                    | 87 -    | 89 -   | 99     | 95 -   | 92 -   | 105    | 110 +  | 109 +  | 111 +  | 115 +  | meq/l                     | 98-107                      |
| Bicarbonate                 | 27.9    |        | 20.4 - | 28.8   | 31.0 + | 28.5   | 23.5   | 24.0   | 25.4   | 27.8   | meq/l                     | 22.0-30.0                   |
| Calcium                     |         |        |        | 7.50 - | 7.20 - | 7.98 - | 8.14 - |        | 8.37 - | 8.51 - | mg/dl                     | 8.60-10.0                   |
| Osmolaliteit                |         |        |        | 258 -  | 258 -  | 283    | 291    |        | 305    | 320 +  | mosm/kg                   | 278-305                     |
| Anion-gap                   | 10.1    |        | 9.6 -  | 4.1 -  | 3.6 -  | 7.7 -  | 9.9 -  |        | 11.7   | 9.3 -  | meq/l                     | 10.0-18.0                   |
| Phosphate                   |         |        | 3.53   | 2.62   | 1.90 - | 1.78 - | 2.24 - | 1.85 - | 2.57   | 3.17   | mg/dl                     | 2.50-4.50                   |
| Magnesium                   |         |        | 1.43 - | 1.73   | 2.00   | 2.31 + | 2.41 - | 2.42 + | 2.24   | 2.52 + | mg/dl                     | 1.60-2.30                   |
| Ammonia                     |         | 22.0   |        |        |        |        |        |        |        |        | umol/l                    | 11.0-32.0                   |
| Urea                        | 24      |        | 23     | 24     | 24     | 23     | 38 +   | 54 +   | 64 +   | 91 +   | mg/dl                     | 15-37                       |
| Creatinine                  | 0.79    |        | 0.77   | 0.77   | 0.80   | 0.86   | 0.96   | 1.00   | 1.02   | 1.06   | mg/dl                     | 0.5-1.2                     |
| Estimated GFR               | 78      |        | 80     | 80     | 77     | 70     | 62     | 59     | 58     | 55     | mL/min/1.73m <sup>2</sup> |                             |
| Uric Acid                   | 3.41    |        |        | 2.69   | 2.72   | 2.51   | 2.89   |        |        |        | mg/dl                     | 2.5-7.5                     |
| Lactate                     | 0.7     |        |        |        |        |        |        |        |        |        | mmol/L                    | Venous 1.0-2.4              |
| Procalcitonin               |         |        | 0.5    |        |        |        |        |        |        |        | ng/mL                     | < 0.5                       |
| Troponin                    | < 0.012 | <0.012 |        |        |        |        |        |        |        |        | ng/mL                     | > 0.12<br>suggestive for MI |
| Serology                    |         |        |        |        |        |        |        |        |        |        |                           |                             |
| Hepatitis B surface antigen |         | neg    |        |        |        |        |        |        |        |        |                           |                             |
| Hepatitis B core antibodies |         | neg    |        |        |        |        |        |        |        |        |                           |                             |

|                                |  |          |     |  |  |  |  |  |  |  |                           |      |
|--------------------------------|--|----------|-----|--|--|--|--|--|--|--|---------------------------|------|
| Hepatitis C surface antibodies |  | neg      |     |  |  |  |  |  |  |  |                           |      |
| Anti-HAV IgM                   |  | doubtful |     |  |  |  |  |  |  |  |                           |      |
| HIV Viral load                 |  | 42       |     |  |  |  |  |  |  |  | Copies/ml pl              | *    |
| HIV Viral load                 |  | 1.62     |     |  |  |  |  |  |  |  | logs                      |      |
| Syphilis Ig-total              |  |          | neg |  |  |  |  |  |  |  |                           |      |
| Anti-cardiolipin IgG           |  |          | 0.2 |  |  |  |  |  |  |  | GPL Units                 | < 10 |
| Anti-cardiolipin IgM           |  |          | 4.1 |  |  |  |  |  |  |  | MPL units                 | < 10 |
| Specific Hematology            |  |          |     |  |  |  |  |  |  |  |                           |      |
| Lymphocytes                    |  | 6.50%    |     |  |  |  |  |  |  |  |                           |      |
| CD45 events                    |  | 38119    |     |  |  |  |  |  |  |  | Pan leucocytes            |      |
| Lymphocytes events             |  | 2584     |     |  |  |  |  |  |  |  |                           |      |
| CD3 events                     |  | 1838     |     |  |  |  |  |  |  |  | T-lymphocytes             |      |
| CD4 events                     |  | 380      |     |  |  |  |  |  |  |  | T-helper cells            |      |
| CD8 events                     |  | 1273     |     |  |  |  |  |  |  |  | T-suppressor              |      |
| CD19 events                    |  | 255      |     |  |  |  |  |  |  |  | B-lymphocytes             |      |
| CD3                            |  | 4.82     |     |  |  |  |  |  |  |  | % of T-lymphocytes        |      |
| CD4                            |  | 1.00     |     |  |  |  |  |  |  |  | % T-helper leucocytes     |      |
| CD4                            |  | 14.71    |     |  |  |  |  |  |  |  | % T-helper lymphocytes    |      |
| CD8                            |  | 3.34     |     |  |  |  |  |  |  |  | % T-suppressor leucocytes |      |
| CD19                           |  | 0.67     |     |  |  |  |  |  |  |  | % B-lymphocytes           |      |

|                          |  |        |      |  |  |        |  |  |  |  |              |           |
|--------------------------|--|--------|------|--|--|--------|--|--|--|--|--------------|-----------|
| B-lymphocytes            |  | 0.0603 |      |  |  |        |  |  |  |  | 10*9/l CD19+ |           |
| Protein C                |  |        | 84.0 |  |  |        |  |  |  |  | %            | 70-130.0  |
| Protein S                |  |        | 54   |  |  |        |  |  |  |  | %            | 50-134.0  |
| Beta-2<br>microglobuline |  |        |      |  |  | 1.99 + |  |  |  |  | mg/L         | 0.70-1.30 |

\*Used test is Amliprep/Cobas Taqman HIV- ROCHE (version 2.0)

### Supplementary information nr 2: Additional result (Urine)

| Urine results    | 27/08<br>12:31 | Units   | Normal values            |
|------------------|----------------|---------|--------------------------|
| pH               | 6.0            |         | 4.8-7.4                  |
| Sodium           | 101.8          | meq/L   |                          |
| Potassium        | 44.6           | meq/l   |                          |
| Osmolality       | 579            | mosm/kg | 300-900                  |
| Protein          | 0.89 ++        | g/l     | < 0.12                   |
| Glucose          | neg            |         | + if > 50mg/dl           |
| Ketones          | +              | mg/dl   | + if > mg/dl             |
| Urobilinogen     | neg            |         | + if > 1mg/dl            |
| Bilirubin        | neg            |         | + if > 1mg/dl            |
| Nitrite          | neg            |         |                          |
| Red blood cells  | 262 +          | /microl | 0-25                     |
| Leucocytes       | 61 +           | /microl | 0-25                     |
| Epithelial cells | 23             | /microl | + if ><br>30cells/microl |
